# Supplementary material for: Direct observation of the solvent reorientation dynamics in the “twisted” intramolecular charge-transfer process of cyanophenyldisilane–water cluster by transient infrared spectroscopy
Source: Royal Society of Chemistry journal article supplement (doi:10.1039/b612758d), 2006-11-24
Supplement: b612758d.pdf [file b612758d.pdf]

## Supporting information

Table S1. Cartesian coordinates of optimized structure of CPDS-H<sub>2</sub>O clusters in the CT state. Coordinates are in unit of Å.

|    | on-ring 1 |           |           | side      |           |           |
|----|-----------|-----------|-----------|-----------|-----------|-----------|
| C  | -0.71069  | 0.698791  | -0.230282 | -0.225326 | -0.848401 | -0.20377  |
| Si | 0.924678  | 1.207106  | 0.339458  | 1.479499  | -1.197444 | 0.272136  |
| Si | 2.692391  | -0.778067 | -0.543478 | 2.827685  | 1.215     | -0.183413 |
| C  | 1.736997  | 2.666426  | -0.539957 | 2.079063  | -1.494911 | 2.044243  |
| H  | 1.096533  | 3.538549  | -0.36055  | 1.696915  | -2.477512 | 2.348761  |
| H  | 1.773846  | 2.520815  | -1.620947 | 1.665699  | -0.760676 | 2.737893  |
| H  | 2.733173  | 2.902826  | -0.16084  | 3.168147  | -1.518855 | 2.137817  |
| C  | 1.447541  | 1.197102  | 2.154188  | 2.493739  | -2.273119 | -0.899133 |
| H  | 0.911614  | 2.023401  | 2.638968  | 2.025419  | -3.264611 | -0.910486 |
| H  | 1.136232  | 0.273669  | 2.643669  | 2.462563  | -1.897901 | -1.923324 |
| H  | 2.517089  | 1.367328  | 2.302075  | 3.529717  | -2.401831 | -0.579902 |
| C  | 2.221682  | -1.046986 | -2.341629 | 2.377301  | 2.367645  | 1.230777  |
| H  | 1.227807  | -1.478613 | -2.452383 | 1.307274  | 2.569741  | 1.278121  |
| H  | 2.257275  | -0.11129  | -2.902453 | 2.700361  | 1.959406  | 2.19027   |
| H  | 2.950017  | -1.734975 | -2.785815 | 2.897143  | 3.320151  | 1.078335  |
| C  | 2.441947  | -2.230449 | 0.618386  | 2.209701  | 1.719296  | -1.881772 |
| H  | 1.395613  | -2.391634 | 0.877916  | 1.128539  | 1.855001  | -1.89577  |
| H  | 2.994729  | -2.069874 | 1.546128  | 2.475054  | 0.97406   | -2.633693 |
| H  | 2.831295  | -3.134809 | 0.13837   | 2.684535  | 2.666855  | -2.159676 |
| C  | 4.369482  | 0.055394  | -0.351956 | 4.641518  | 0.710964  | -0.155459 |
| H  | 4.472217  | 0.923865  | -1.00434  | 4.933302  | 0.292654  | 0.809677  |
| H  | 4.557839  | 0.360724  | 0.678847  | 4.876201  | -0.010534 | -0.939612 |
| H  | 5.143147  | -0.669092 | -0.630987 | 5.249985  | 1.605715  | -0.328991 |
| C  | -1.142274 | -0.647933 | -0.555049 | -0.915654 | 0.417672  | -0.028932 |
| C  | -1.789334 | 1.641859  | 0.050424  | -1.091379 | -2.019514 | -0.288434 |
| C  | -2.467109 | -0.996095 | -0.640371 | -2.281814 | 0.517738  | -0.024342 |
| C  | -3.11222  | 1.290435  | -0.024806 | -2.459606 | -1.923647 | -0.266856 |
| H  | -0.410516 | -1.420043 | -0.758178 | -0.348847 | 1.334795  | 0.076925  |
| H  | -1.555801 | 2.67086   | 0.308725  | -0.657228 | -3.00789  | -0.407057 |
| H  | -2.741912 | -2.004927 | -0.919979 | -2.76132  | 1.482616  | 0.069372  |
| H  | -3.878593 | 2.030074  | 0.165418  | -3.0653   | -2.814073 | -0.371674 |
| C  | -3.500137 | -0.042363 | -0.373269 | -3.099156 | -0.652285 | -0.140012 |
| C  | -4.874529 | -0.414636 | -0.446126 | -4.518129 | -0.531472 | -0.127215 |
| N  | -5.975826 | -0.718017 | -0.501112 | -5.655428 | -0.401187 | -0.114606 |
| H  | -1.078349 | -1.341796 | 1.863479  | -5.47596  | 2.124479  | -0.285046 |
| O  | -0.479559 | -1.751596 | 2.477504  | -5.149319 | 2.778551  | 0.319077  |
| H  | -1.033109 | -2.251986 | 3.059603  | -5.271779 | 2.362725  | 1.160979  |

Table S1. continued.

|    | Linear    |           |           | on-ring 2 |           |           |
|----|-----------|-----------|-----------|-----------|-----------|-----------|
| C  | 0.037601  | 0.610494  | -0.232559 | 0.644171  | 0.011802  | -0.368365 |
| Si | -1.62988  | 1.162142  | 0.183167  | -0.865955 | 0.959005  | 0.035308  |
| Si | -3.21721  | -1.127287 | -0.102792 | -2.831637 | -1.033983 | -0.055205 |
| C  | -2.207184 | 1.657042  | 1.917088  | -1.314176 | 1.667669  | 1.728435  |
| H  | -1.727089 | 2.615803  | 2.150434  | -0.702874 | 2.564085  | 1.872366  |
| H  | -1.876889 | 0.941031  | 2.671629  | -1.081644 | 0.965003  | 2.53105   |
| H  | -3.288407 | 1.80045   | 1.992167  | -2.367648 | 1.955493  | 1.792803  |
| C  | -2.518539 | 2.236215  | -1.086794 | -1.545732 | 2.056836  | -1.333137 |
| H  | -1.952909 | 3.172139  | -1.167799 | -0.871851 | 2.917278  | -1.403612 |
| H  | -2.515116 | 1.778956  | -2.077594 | -1.552164 | 1.553001  | -2.300906 |
| H  | -3.539398 | 2.492487  | -0.797219 | -2.542468 | 2.43968   | -1.106807 |
| C  | -2.888757 | -2.203228 | 1.402423  | -2.804068 | -1.984655 | 1.570059  |
| H  | -1.84359  | -2.502678 | 1.480399  | -1.855426 | -2.497062 | 1.732507  |
| H  | -3.176304 | -1.691249 | 2.322668  | -2.996033 | -1.325674 | 2.41914   |
| H  | -3.497561 | -3.110403 | 1.31804   | -3.597227 | -2.740465 | 1.545876  |
| C  | -2.647123 | -1.823322 | -1.749497 | -2.281558 | -2.017029 | -1.55818  |
| H  | -1.582731 | -2.057272 | -1.74485  | -1.260155 | -2.379925 | -1.440754 |
| H  | -2.843579 | -1.121016 | -2.561536 | -2.326712 | -1.409302 | -2.463845 |
| H  | -3.206055 | -2.743428 | -1.953288 | -2.94855  | -2.876307 | -1.688902 |
| C  | -4.969564 | -0.440982 | -0.134775 | -4.456703 | -0.109416 | -0.301289 |
| H  | -5.220657 | 0.078496  | 0.791867  | -4.672661 | 0.558465  | 0.535221  |
| H  | -5.126301 | 0.23744   | -0.974836 | -4.456674 | 0.472641  | -1.224402 |
| H  | -5.66568  | -1.279996 | -0.246091 | -5.27092  | -0.840114 | -0.363989 |
| C  | 0.600651  | -0.697893 | 0.046999  | 1.051052  | -1.160783 | 0.3873    |
| C  | 1.013606  | 1.685647  | -0.377676 | 1.740921  | 0.793887  | -0.921849 |
| C  | 1.951032  | -0.92302  | 0.094677  | 2.360727  | -1.548207 | 0.506466  |
| C  | 2.365463  | 1.464032  | -0.311808 | 3.057309  | 0.418582  | -0.786374 |
| H  | -0.053112 | -1.548158 | 0.20029   | 0.298493  | -1.780516 | 0.862896  |
| H  | 0.678601  | 2.699209  | -0.577171 | 1.524238  | 1.67791   | -1.510536 |
| H  | 2.327549  | -1.922221 | 0.268934  | 2.613174  | -2.453722 | 1.041942  |
| H  | 3.055022  | 2.284244  | -0.461084 | 3.836758  | 0.994173  | -1.269427 |
| C  | 2.881073  | 0.151714  | -0.078237 | 3.411404  | -0.763091 | -0.068037 |
| C  | 4.283617  | -0.082528 | -0.013732 | 4.777453  | -1.151068 | 0.072939  |
| N  | 5.409582  | -0.273793 | 0.038233  | 5.872264  | -1.46036  | 0.186074  |
| H  | 7.529364  | -0.681576 | 0.343675  | 1.612227  | 4.396503  | 0.306877  |
| O  | 8.448972  | -0.868283 | 0.190614  | 1.193501  | 3.604794  | 0.612667  |
| H  | 8.514004  | -0.872439 | -0.753085 | 1.885758  | 2.955552  | 0.639397  |

Table S1. continued.

| disilanyl-side |           |           |           |
|----------------|-----------|-----------|-----------|
| C              | -1.063401 | -0.41571  | -0.185163 |
| Si             | 0.669094  | -0.870738 | -0.00448  |
| Si             | 2.064836  | 1.555058  | -0.092626 |
| C              | 1.412614  | -1.544765 | 1.59796   |
| H              | 1.017574  | -2.561021 | 1.725569  |
| H              | 1.090488  | -0.96552  | 2.465088  |
| H              | 2.502235  | -1.606004 | 1.567724  |
| C              | 1.530978  | -1.680992 | -1.471222 |
| H              | 1.01195   | -2.628363 | -1.661271 |
| H              | 1.438475  | -1.084456 | -2.380609 |
| H              | 2.578709  | -1.904629 | -1.265129 |
| C              | 1.860326  | 2.314473  | 1.614916  |
| H              | 0.812395  | 2.460336  | 1.878886  |
| H              | 2.332477  | 1.694395  | 2.379193  |
| H              | 2.35279   | 3.293261  | 1.622248  |
| C              | 1.252408  | 2.490084  | -1.503747 |
| H              | 0.209567  | 2.72718   | -1.297518 |
| H              | 1.298329  | 1.915201  | -2.430529 |
| H              | 1.801037  | 3.426033  | -1.658918 |
| C              | 3.832609  | 1.038679  | -0.471028 |
| H              | 4.201839  | 0.276789  | 0.216104  |
| H              | 3.920026  | 0.658307  | -1.490483 |
| H              | 4.472712  | 1.924195  | -0.383946 |
| C              | -1.681806 | 0.826599  | 0.226299  |
| C              | -1.983124 | -1.513156 | -0.442062 |
| C              | -3.042006 | 0.975915  | 0.313692  |
| C              | -3.343488 | -1.368507 | -0.3398   |
| H              | -1.067744 | 1.684755  | 0.471829  |
| H              | -1.600192 | -2.481752 | -0.750424 |
| H              | -3.461889 | 1.930243  | 0.603276  |
| H              | -3.992212 | -2.204251 | -0.566741 |
| C              | -3.923282 | -0.116488 | 0.035548  |
| C              | -5.336331 | 0.038731  | 0.136143  |
| N              | -6.470536 | 0.165445  | 0.216458  |
| H              | 5.597388  | -2.320167 | -0.165289 |
| O              | 4.827449  | -2.267482 | 0.383389  |
| H              | 4.790206  | -3.102456 | 0.828887  |
